# Supplementary material
Source: MDPI journal article supplement (https://www.mdpi.com/2072-4292/11/7/743)
Supplement: s1 [file s1]

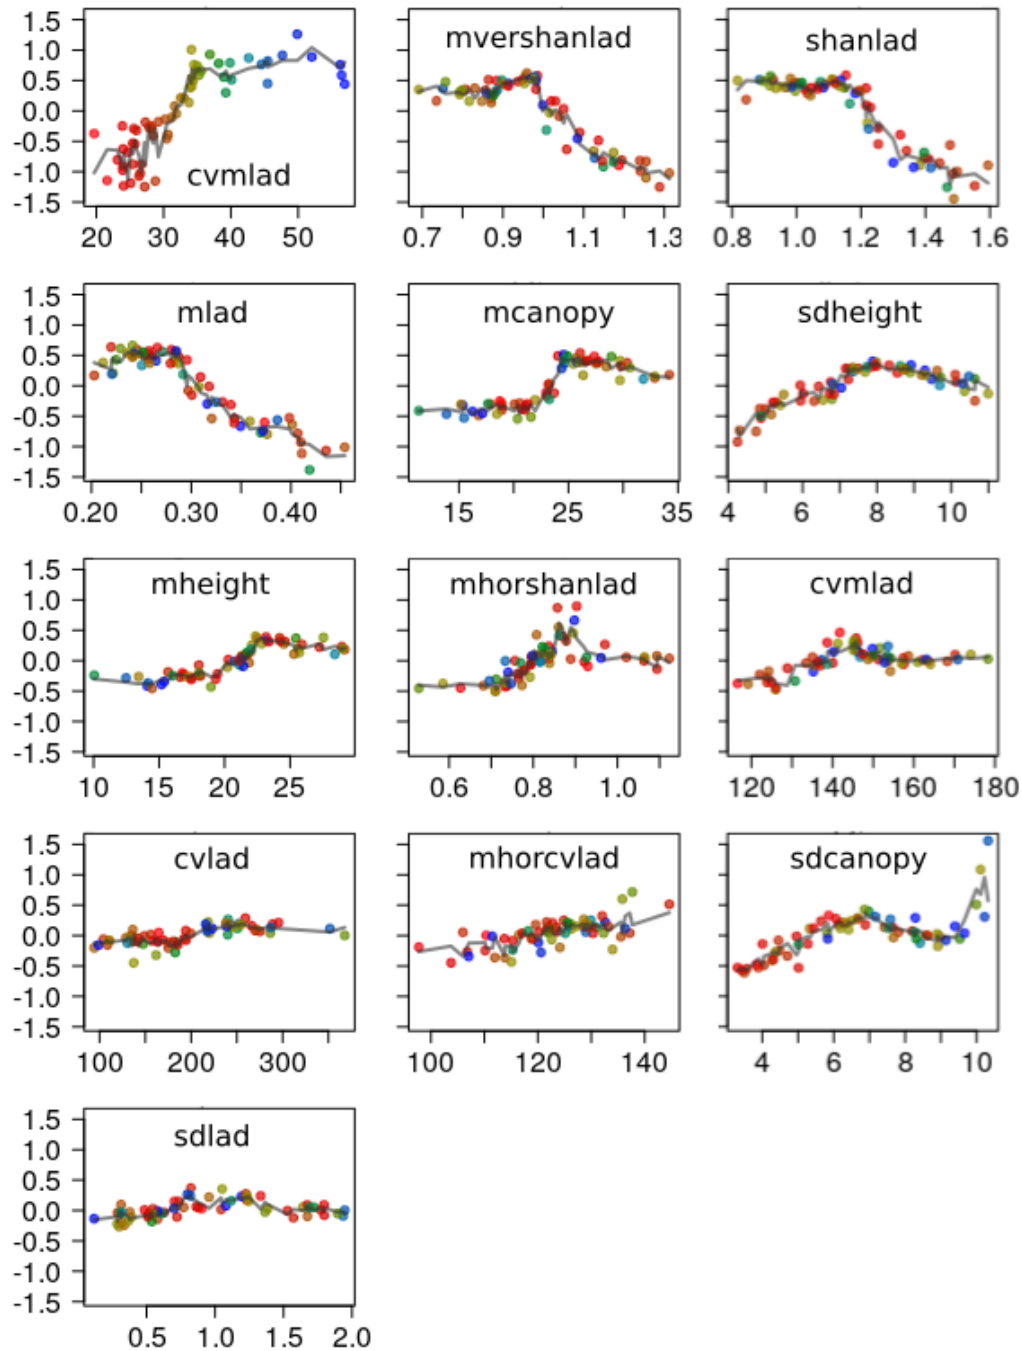

**Figure S4.** Feature contribution analysis model with all LiDAR-derived metrics. Each graph represents the influence (intensity and direction, positive or negative) of a certain explanatory variable. The x axis represents the value of the explanatory variable. The y axis represents the feature contribution, or the change in predicted bird richness for a certain value of the explanatory variable. The colour gradients help to visualize the interaction between *cvladm* and rest of the metrics. The fitted line was estimated with a *knn* function with Gaussian distance weighting.
